# Supplementary material for: A MXene@AgAu@PDA nanoplatform loaded with AgAu nanocages for enhancing catalytic activity and antibacterial performance
Source: Royal Society of Chemistry journal article supplement (doi:10.1039/d3tb01755a), 2023-01-01
Supplement: d3tb01755a1.pdf [file d3tb01755a1.pdf]

## **MXene@AgAu@PDA nanoplatform loaded with AgAu nanocages for enhancing catalytic activity and antibacterial performance**

Guanghai Liu<sup>a</sup>, Hongfa Wang<sup>d</sup>, Chunyan Xu<sup>\*b</sup>, Qunling Fang<sup>c</sup>, Hailong Wang<sup>\*d</sup>, Yunqi Xu<sup>d</sup>, Min Sang<sup>d</sup>, Shouhu Xuan<sup>\*d</sup>, Lingyun Hao<sup>\*a</sup>

<sup>a</sup> *School of Materials Engineering, Jinling Institute of Technology, Nanjing, 211169, PR China*

<sup>b</sup> *School of Resources and Environmental Engineering, Anhui University, Hefei, 230601, PR China*

<sup>c</sup> *Key Laboratory of Metabolism and Regulation for Major Diseases of Anhui Higher Education Institutes, School of Food and Biological Engineering, Hefei University of Technology, Hefei, 230009, PR China.*

<sup>d</sup> *CAS Key Laboratory of Mechanical Behavior and Design of Materials, Department of Modern Mechanics, University of Science and Technology of China, Hefei, 230027, PR China.*

\*Corresponding author:

Prof. Lingyun Hao  
E-mail: hly\_jit66@126.com  
Tel: 86-025-86188617  
Fax: 86-025-86188617

Prof. Shouhu Xuan  
E-mail: xuansh@ustc.edu.cn  
Tel: 86-551-63601702  
Fax: 86-551-63606382

Prof. Hailong Wang  
E-mail: hailwang@ustc.edu.cn

Prof. Chunyan Xu  
E-mail: chunyan.xu@ahu.edu.cn

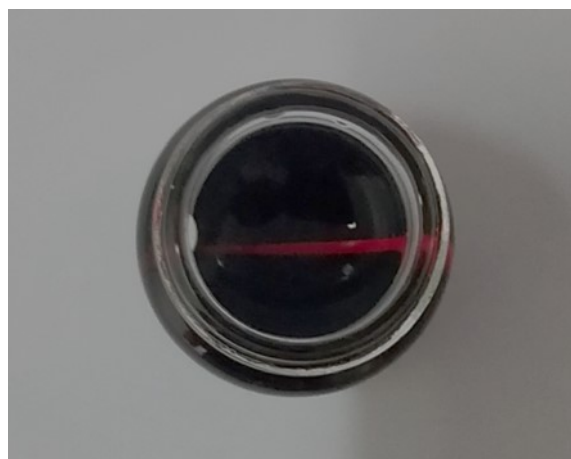

**Fig. S1.** Digital image of MXene aqueous solution with a typical Tyndall effect.

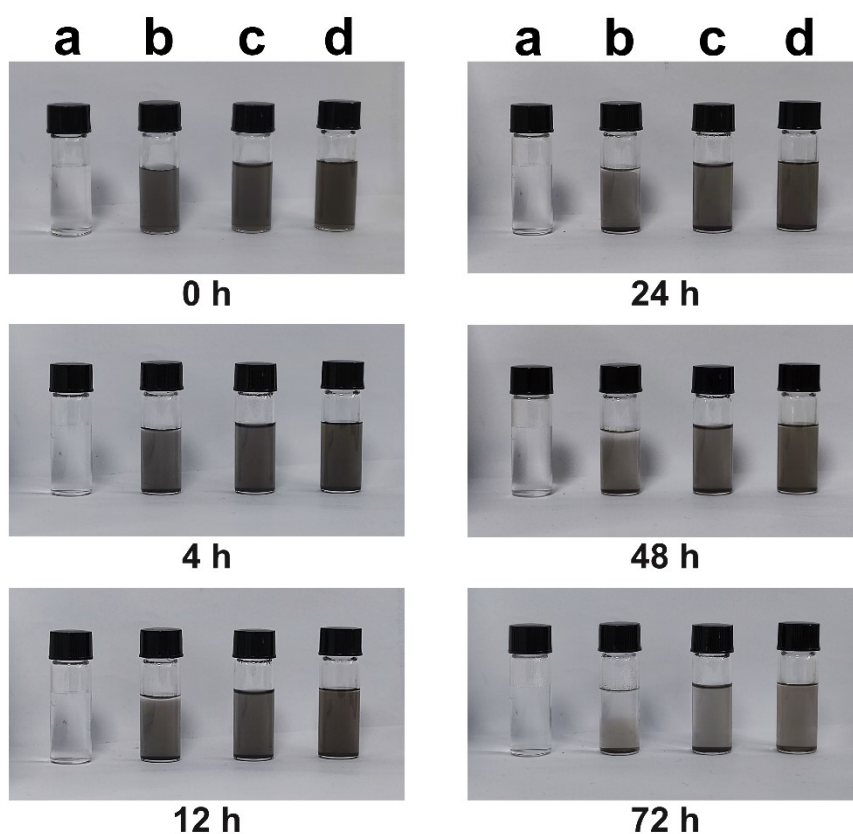

**Fig. S2.** The stability of 40  $\mu\text{g}\cdot\text{mL}^{-1}$  MXene@AgAu@PDA nanosheets in water, ethanol, and N, N-Dimethylformamide (DMF) three commonly used solvents over time. (a: H<sub>2</sub>O; b: H<sub>2</sub>O + 40  $\mu\text{g}\cdot\text{mL}^{-1}$  MXene@AgAu@PDA; c: ethanol + 40  $\mu\text{g}\cdot\text{mL}^{-1}$  MXene@AgAu@PDA; d: DMF + 40  $\mu\text{g}\cdot\text{mL}^{-1}$  MXene@AgAu@PDA)

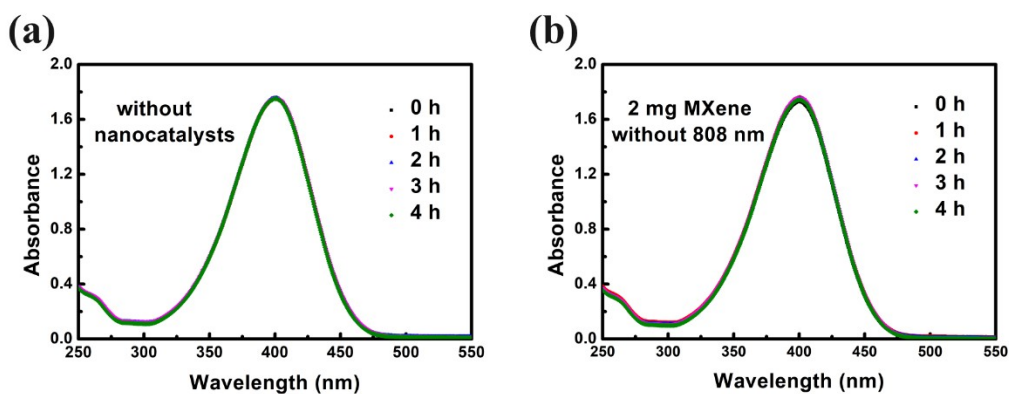

**Fig. S3.** Time-dependent absorption spectra for the catalytic reduction of 4-nitrophenol by (a) none and (b) 2 mg MXene under dark conditions.

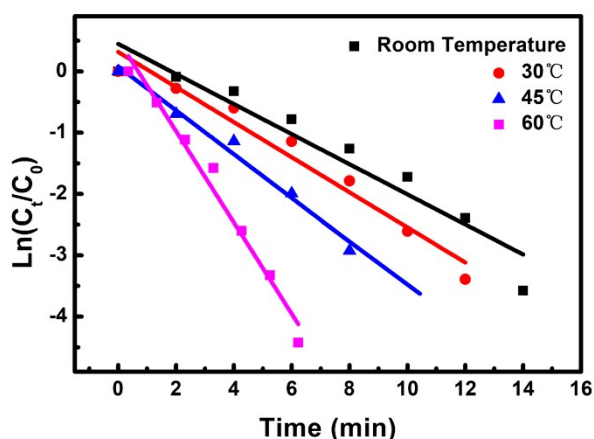

**Fig. S4.** The linear relationship between the reaction time and  $\ln(C_t/C_0)$  of MXene@AgAu@PDA nanocatalysts with different oil bath temperatures. The results showed that the catalytic activity increased with the increase of temperature.

### Computational Details

The density functional theory (DFT) calculation were carried out using Vienna Ab initio Simulation Package (VASP). The exchange–correlation energy functional was described by Perdew-Burke-Ernzerhof generalized gradient approximation (GGA-PBE) and the projector augmented wave (PAW) pseudopotentials was used to describe the core electrons interaction. The KPOINTS mesh density was  $4 \times 3 \times 1$  using Gamma center scheme, and the plane wave energy cutoff was set to 350 eV. The vacuum region was set to 10 Å. The energy convergence threshold was set to  $10^{-6}$  eV and the force

threshold was set to 0.01 eV/Å during structure optimization.

The charge density difference was calculated by the formula,

$$\Delta\rho = \rho(\text{AgAu}@Ti_3C_2O_2) - \rho(\text{AgAu}) - \rho(Ti_3C_2O_2)$$

Where the  $\rho(\text{AgAu}@Ti_3C_2O_2)$ ,  $\rho(\text{AgAu})$ ,  $\rho(Ti_3C_2O_2)$  is the charge density of AgAu@Ti<sub>3</sub>C<sub>2</sub>O<sub>2</sub>, AgAu and Ti<sub>3</sub>C<sub>2</sub>O<sub>2</sub> respectively.
